# Supplementary material for: Selective targeting of BCL6 induces oncogene addiction switching to BCL2 in B-cell lymphoma
Source: PubMed Central journal article supplement (PMC4823124; doi:10.18632/oncotarget.6513), 2015-12-09
Supplement: oncotarget-07-3520-s001.pdf [file oncotarget-07-3520-s001.pdf]

SUPPLEMENTARY FIGURES AND TABLES

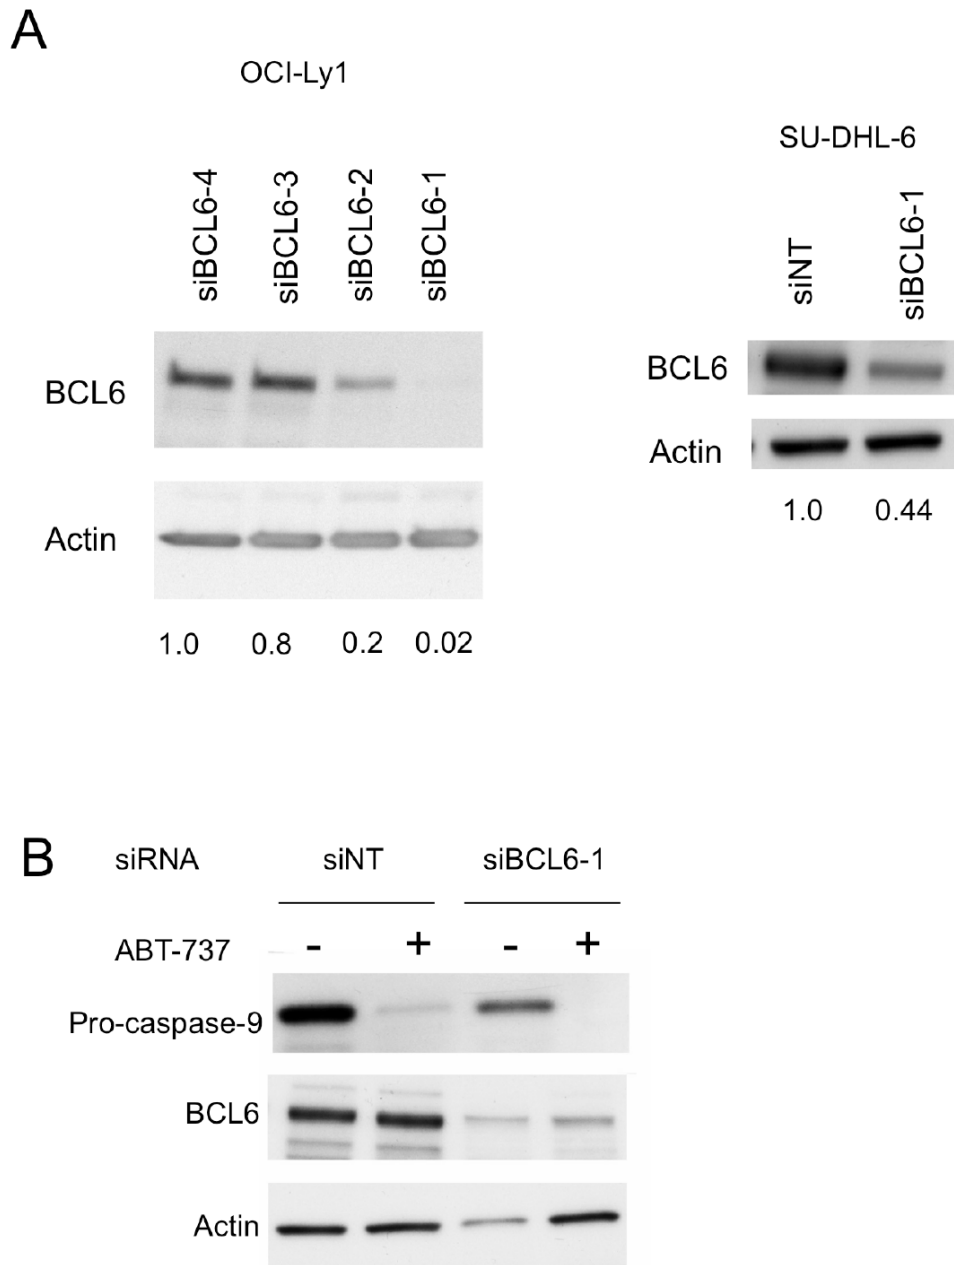

**Supplementary Figure S1: BCL6 knockdown in GCB-DLBCL cells.** **A.** BCL6 siRNA screening in OCI-Ly1 cells. Effect of siBCL6-1 in SU-DHL6 cells. Densitometry values of BCL6 and actin immunoblots comparing siBCL6-1 vs. non-targeted RNA (siNT) are shown at the bottom. **B.** Effect on BCL6 and pro-caspase 9 levels of siBCL6-1 vs. siNT in OCI-Ly1 cells treated with ABT-737 or vehicle.

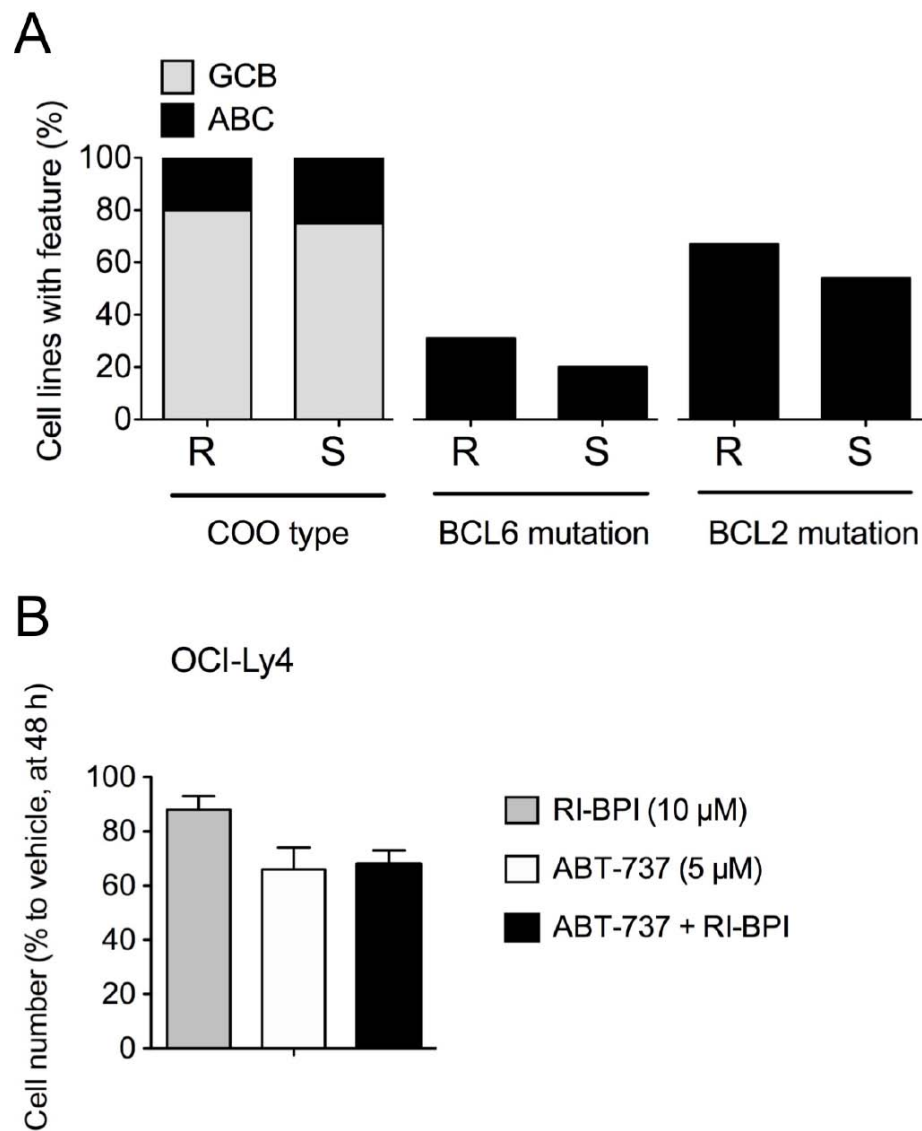

**Supplementary Figure S2: Baseline features of DLBCL cells responsive and resistant to RI-BPI.** **A.** Baseline features of RI-BPI sensitive (S) and resistant (R) groups of DLBCL cells according to cell-of-origin (COO) classification into GCB and ABC groups, the presence of BCL6 translocation (3q27) and BCL2 mutation (including amplification and translocation). Differences are not statistically significant. **B.** BCL2 inhibition does not improve response to BCL6 inhibition. Cell viability (as percent cells to vehicle) in the BCL6-independent cells line OCI-Ly4 treated with RI-BPI, ABT-737 or the combination for 48 h. Experiment was done in quintuplicates.

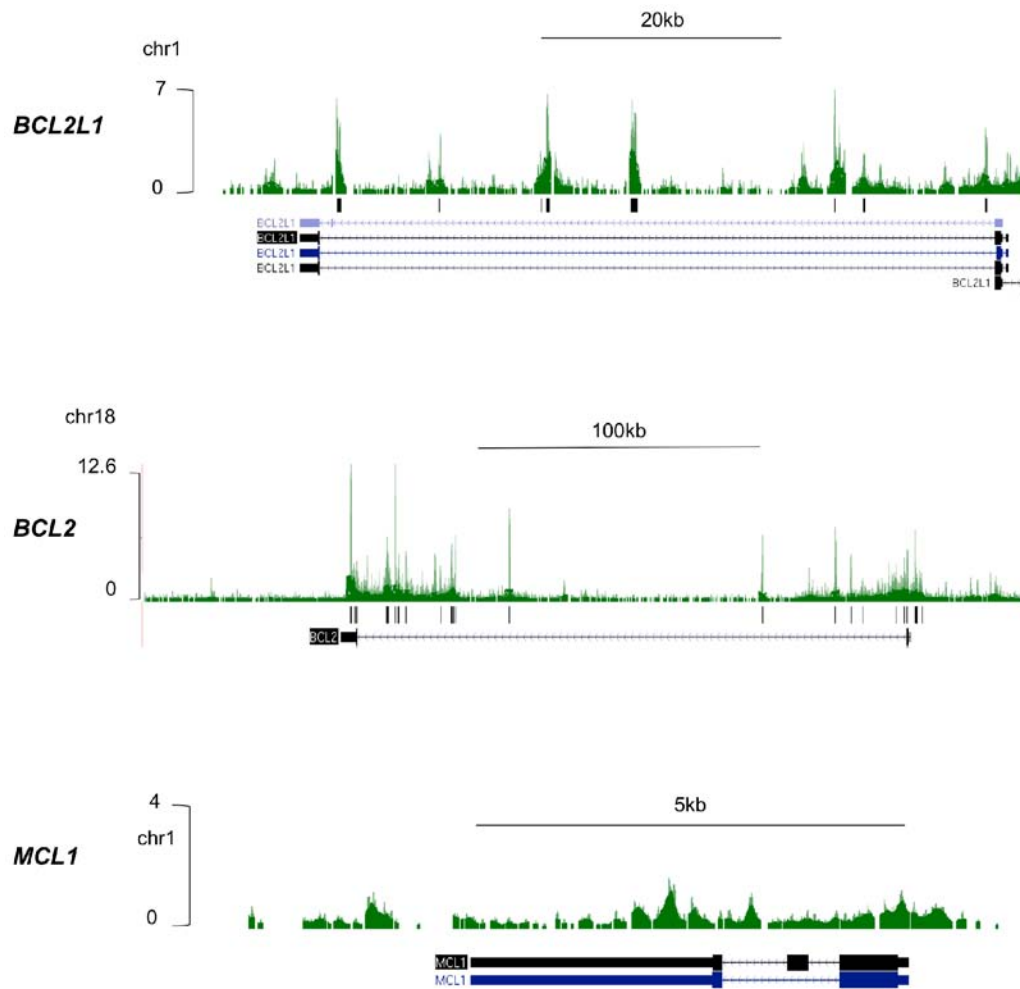

**Supplementary Figure S3: BCL6 target genes from the BCL2-family.** Genome-browser representation of BCL6 ChIP-seq data for genes with binding peaks *BCL2L1*, *BCL2* and *MCL1*. Peaks are in green and significant called peaks are shown with black squares.

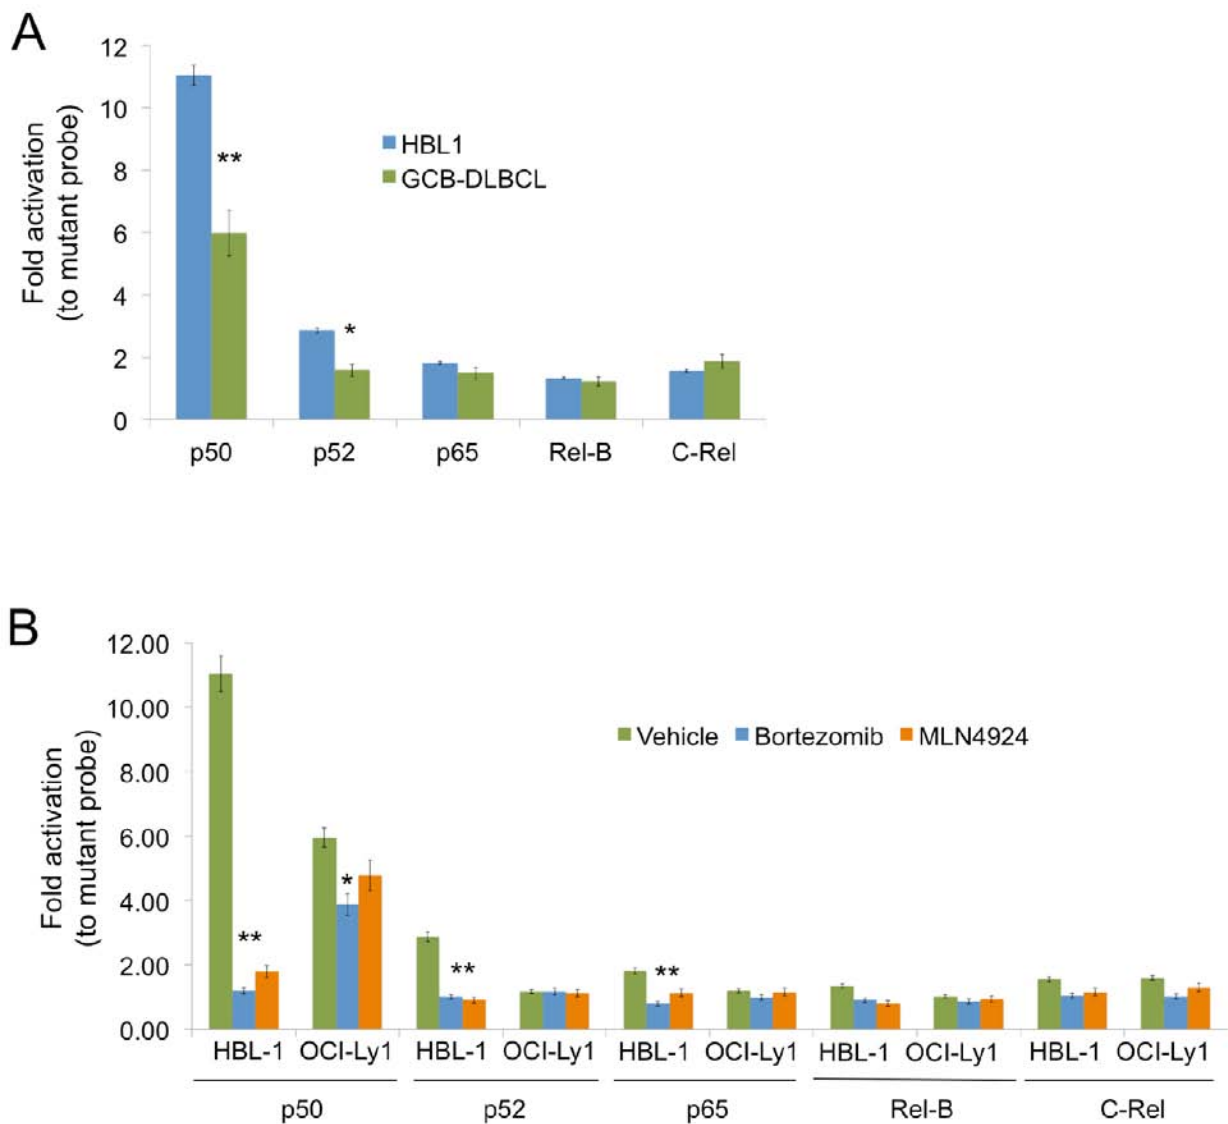

**Supplementary Figure S4: NFkB pathway activation in GCB-DLBCL cells.** **A.** DNA binding activity (as fold activation to mutant probe) of NFkB members p50, p52, p65, Rel-B and C-Rel from nuclear lysates of HBL-1 (ABC-DLBCL) and the combined representation of 3 GCB-DLBCL cell lines (OCI-Ly1, OCI-Ly7 and SU-DHL6). \*\*denotes  $p < 0.01$  and \*denotes  $p < 0.05$ . **B.** DNA binding activity (as fold activation to mutant probe) of NFkB members p50, p52, p65, Rel-B and C-Rel from nuclear lysates of HBL-1 (ABC-DLBCL) and OCI-Ly1 (GCB-DLBCL) cells treated with bortezomib, MLN4924 or vehicle at their respective  $GI_{50}$ s for 24 h. \*\*denotes  $p < 0.01$  (for both drugs) and \*denotes  $p < 0.05$ .

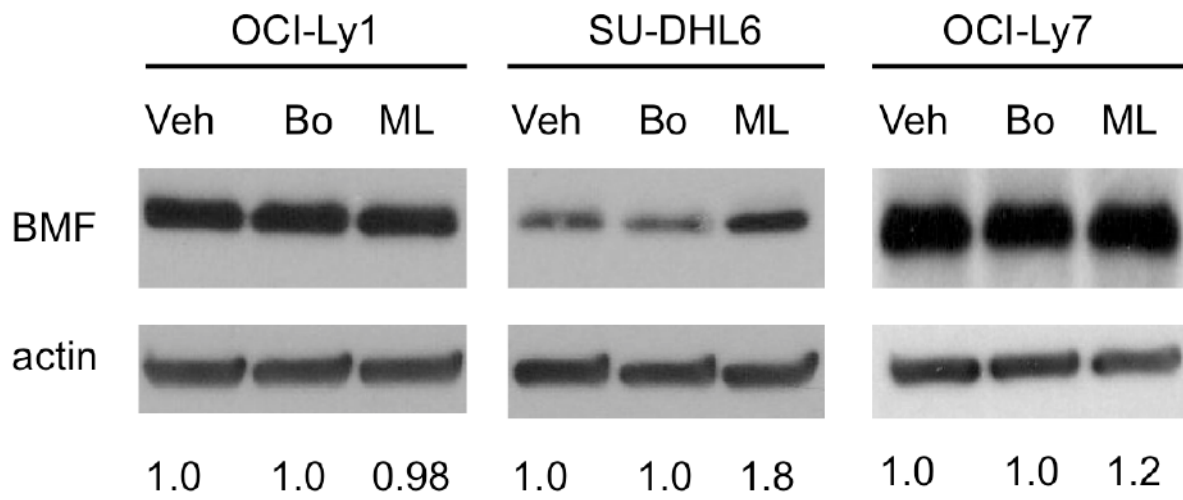

**Supplementary Figure S5: Effect of MLN4924 and bortezomib on BMF.** Effect on BMF protein levels at 24 h after exposure to bortezomib (Bo) and MLN4924 (ML) vs. vehicle (Veh) in OCI-Ly1, SU-DHL6 and OCI-Ly7 cell lines.

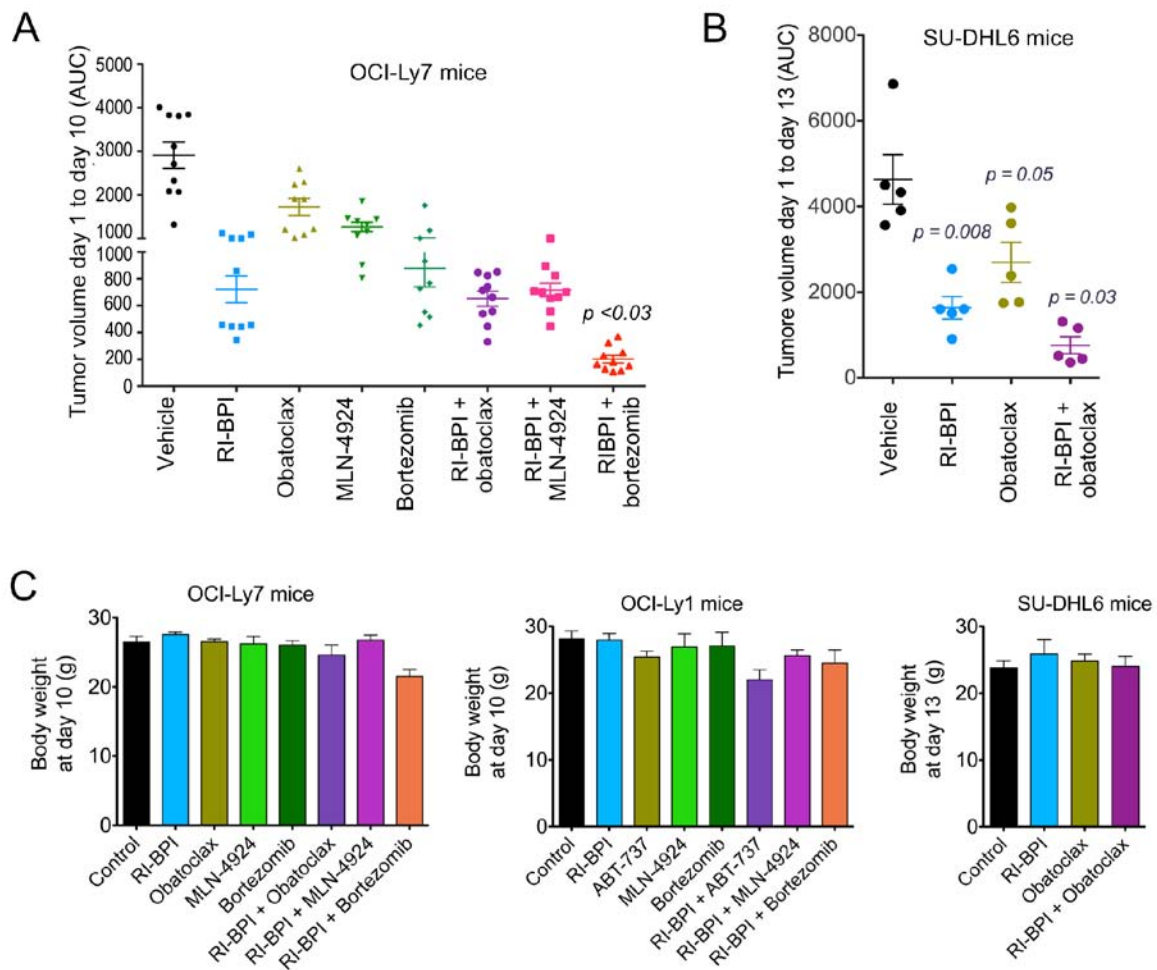

**Supplementary Figure S6: Targeting or pro-survival pathways increased the effect of RI-BPI *in vivo*.** **A.** Tumor volume represented by the area under the curve (AUC) of xenograft growth from day 1 to day 10 of treatment in OCI-Ly7 mice treated with the compounds shown in the X-axis. Only statistically significant  $p$  values are depicted ( $T$ -test). **B.** Body weight of OCI-Ly7 and OCI-Ly1 mice at day 10.



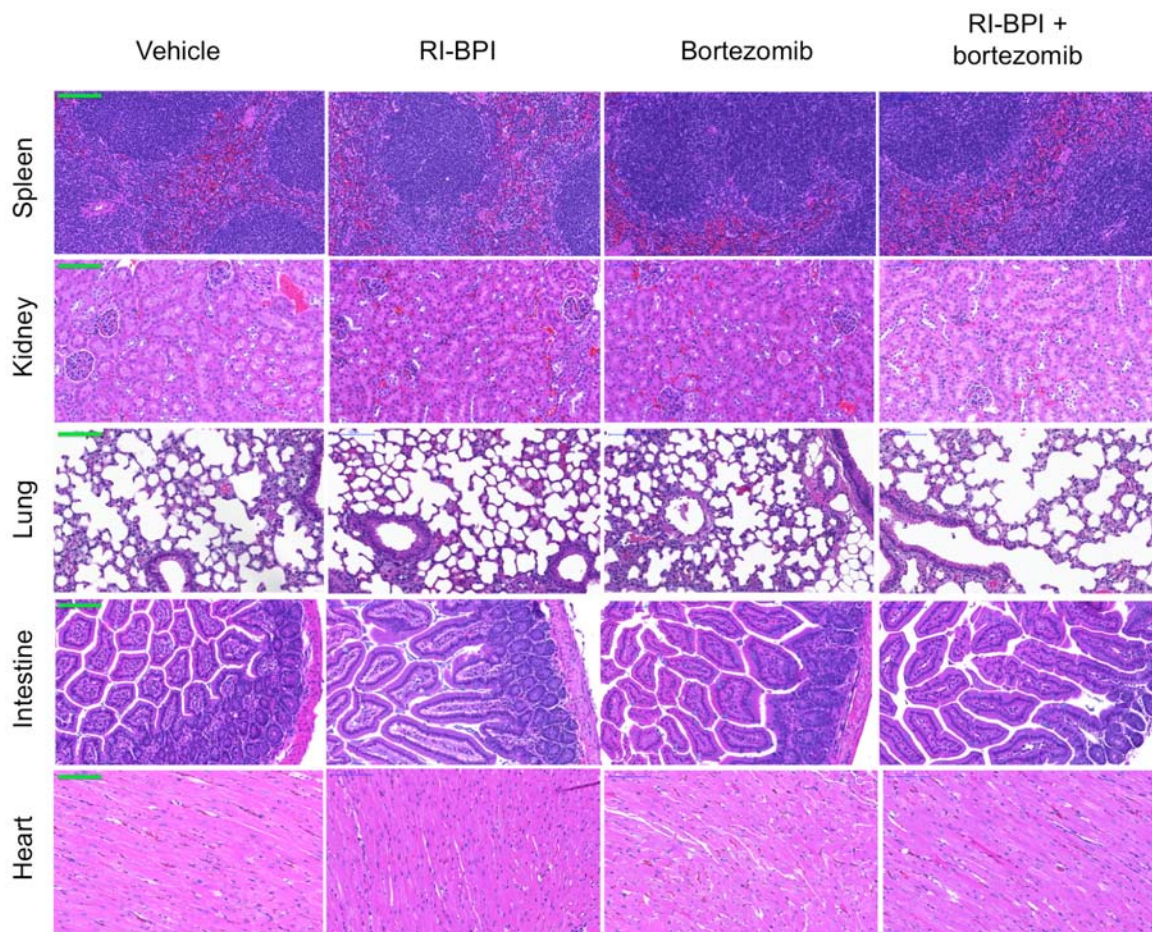

**Supplementary Figure S7: Tissue toxicity of RI-BPI, bortezomib and combination.** Representative images from the histopathological analysis (H&E) of C57BL/6 mice treated with vehicle, RI-BPI, bortezomib or the combination of RI-BPI and bortezomib. Doses and schedule are the same that were used in xenograft experiments. The green bar represents 100 micrometers.

Supplementary Table S1: Pharmacokinetic study of RI-BPI

| Parameter                               | Time (h) | Rat 1   | Rat 2    | Rat 3    | Mean     | SD      |
|-----------------------------------------|----------|---------|----------|----------|----------|---------|
|                                         | 0.00     | 7.460   | 1.550    | 2.110    | 3.707    | 3.263   |
|                                         | 0.08     | 148.000 | 155.000  | 212.000  | 171.667  | 35.105  |
|                                         | 0.25     | 71.500  | 90.700   | 78.200   | 80.133   | 9.745   |
|                                         | 0.50     | 37.200  | 37.200   | 47.500   | 40.633   | 5.947   |
|                                         | 1.00     | 16.400  | 20.700   | 31.200   | 22.767   | 7.613   |
|                                         | 2.00     | 11.000  | 11.100   | 11.100   | 11.067   | 0.058   |
|                                         | 4.00     | 1.970   | 3.550    | 2.860    | 2.793    | 0.792   |
| <b>Dose, mg/kg</b>                      |          | 10      | 10       | 10       | 10       | 0       |
| <b>C<sub>max</sub>, µg/mL</b>           |          | 148.000 | 155.000  | 212.000  | 171.667  | 35.105  |
| <b>AUC(0-T), µg·h/mL</b>                |          | 78.5334 | 88.1590  | 103.7289 | 90.1404  | 12.7141 |
| <b>AUC(0-inf), µg·h/mL</b>              |          | 82.0512 | 95.4241  | 107.5078 | 94.9944  | 12.7337 |
| <b>AUC(0-T)/AUC(0-inf)</b>              |          | 0.9571  | 0.9239   | 0.9648   | 0.9486   | 0.0217  |
| <b>AUMC(0-T), µg·h<sup>2</sup>/mL</b>   |          | 65.3888 | 76.3118  | 83.2718  | 74.9908  | 9.0144  |
| <b>AUMC(0-inf), µg·h<sup>2</sup>/mL</b> |          | 84.2900 | 117.7870 | 103.2347 | 101.7706 | 16.7964 |
| <b>CL, L/h/kg</b>                       |          | 0.1219  | 0.1048   | 0.0930   | 0.1066   | 0.0145  |
| <b>V<sub>ss</sub>, L/kg</b>             |          | 0.1219  | 0.1258   | 0.0930   | 0.1136   | 0.0179  |
| <b>MRT, h</b>                           |          | 1.0     | 1.2      | 1.0      | 1.1      | 0.1     |
| <b>l, 1/h</b>                           |          | 0.7283  | 0.5852   | 0.7796   | 0.6977   | 0.1007  |
| <b>T<sub>1/2</sub>, h</b>               |          | 1.0     | 1.2      | 0.9      | 1.0      | 0.1     |
| <b>r<sup>2</sup></b>                    |          | 0.9761  | 0.9995   | 0.9874   | 0.9877   | 0.0117  |



Supplementary Table S2: Toxicity of individual and combinatorial regimens

|                      | Vehicle | RI-<br>BPI | Bortezomib | Obatoclox | MLN4924 | RI-BPI +<br>Bortezomib | RI-BPI +<br>Obatoclox | RI-BPI +<br>MLN4924 |
|----------------------|---------|------------|------------|-----------|---------|------------------------|-----------------------|---------------------|
| RBC (M/uL)           | 10.16   | 10.14      | 10.33      | 10.04     | 10.0    | 9.85                   | 10.11                 | 10.20               |
| HGB (g/dL)           | 15.2    | 15.0       | 15.5       | 15.0      | 15.0    | 14.9                   | 15.0                  | 15.0                |
| HCT (%)              | 57.7    | 57.6       | 57.6       | 56.1      | 57.0    | 52.0                   | 54.4                  | 56.6                |
| MCV (fL)             | 56.7    | 56.8       | 55.8       | 55.8      | 57.0    | 52.8                   | 53.8                  | 55.0                |
| MCH (pg)             | 15.0    | 14.8       | 15.0       | 14.9      | 15.0    | 15.1                   | 14.8                  | 14.9                |
| MCHC (g/dL)          | 26.4    | 26.1       | 26.8       | 26.8      | 26.5    | 28.6                   | 27.5                  | 27.0                |
| RDW-SD (fL)          | 32.5    | 33.8       | 33.7       | 32.2      | 32.2    | 33.2                   | 31.2                  | 32.1                |
| RDW-CV (%)           | 21.8    | 22.3       | 23.0       | 22.0      | 22.0    | 24.2                   | 22.6                  | 22.6                |
| Reticulocytes (K/uL) | 444.2   | 443.3      | 443.7      | 440.2     | 442.0   | 463.2                  | 567.2                 | 482.0               |
| Reticulocytes (%)    | 4.37    | 4.36       | 4.25       | 4.29      | 4.3     | 4.71                   | 5.62                  | 5.40                |
| Platelets (K/uL)     | 644     | 941        | 850        | 801       | 850     | 953                    | 902                   | 804                 |
| PDW (fL)             | 7.6     | 7.3        | 7.7        | 7.5       | 7.7     | 8.3                    | 7.2                   | 7.2                 |
| MPV (fL)             | 6.7     | 6.5        | 6.6        | 6.4       | 6.5     | 6.6                    | 6.3                   | 6.4                 |
| WBC# (K/uL)          | 10.88   | 7.33       | 11.96      | 8.57      | 9.6     | 9.53                   | 7.40                  | 8.90                |
| NEUT# (K/uL)         | 1.47    | 1.73       | 2.40       | 1.40      | 2.0     | 3.33                   | 1.37                  | 1.54                |
| LYMPH# (K/uL)        | 8.87    | 4.73       | 7.86       | 6.50      | 7.0     | 4.56                   | 5.33                  | 6.80                |
| MONO# (K/uL)         | 0.26    | 0.51       | 1.31       | 0.37      | 0.4     | 1.30                   | 0.53                  | 0.32                |
| EO# (K/uL)           | 0.25    | 0.34       | 0.38       | 0.28      | 0.2     | 0.32                   | 0.15                  | 0.20                |
| BASO# (K/uL)         | 0.02    | 0.01       | 0.01       | 0.01      | 0.0     | 0.03                   | 0.02                  | 0.04                |
| NEUT (%)             | 13.2    | 24.3       | 16.0       | 17.7      | 20.8    | 34.7                   | 18.9                  | 17.3                |
| LYMPH (%)            | 81.9    | 63.7       | 73.3       | 73.7      | 72.9    | 49.4                   | 71.6                  | 76.4                |
| MONO (%)             | 2.6     | 6.9        | 7.9        | 4.9       | 4.2     | 12.5                   | 7.2                   | 3.6                 |
| EO (%)               | 2.1     | 4.8        | 2.7        | 3.5       | 2.1     | 3.3                    | 2.0                   | 2.2                 |
| BASO (%)             | 0.2     | 0.2        | 0.2        | 0.1       | 0.0     | 0.3                    | 0.3                   | 0.4                 |
| BUN (mg/dL)          | 31.2    | 20.8       | 24.6       | 24.8      | 22.5    | 16.3                   | 22.8                  | 22.6                |
| CREA (mg/dL)         | 0.2     | 0.3        | 0.2        | 0.2       | 0.2     | 0.2                    | 0.3                   | 0.2                 |
| ALP (U/L)            | 128.4   | 66.6       | 111.6      | 135.4     | 144.7   | 55.3                   | 189.5                 | 156.7               |
| ALT (U/L)            | 538.4   | 278.0      | 734.6      | 206.8     | 408.5   | 526.5                  | 835.3                 | 558.3               |
| AST (U/L)            | 759.8   | 452.2      | 1035.8     | 227.8     | 844.3   | 1221.5                 | 1881.8                | 966.2               |
| TBIL (mg/dL)         | 0.4     | 0.5        | 0.6        | 0.4       | 0.4     | 0.9                    | 0.7                   | 0.4                 |
| DBIL (mg/dL)         | 0.0     | 0.0        | 0.0        | 0.0       | 0.0     | 0.0                    | 0.0                   | 0.0                 |
| IBIL (mg/dL)         | 0.4     | 0.5        | 0.6        | 0.4       | 0.4     | 0.9                    | 0.7                   | 0.8                 |
| TP (g/dL)            | 5.6     | 5.7        | 4.9        | 5.4       | 5.5     | 5.7                    | 6.0                   | 5.6                 |

(Continued)

|                    | Vehicle | RI-<br>BPI | Bortezomib | Obatoclax | MLN4924 | RI-BPI +<br>Bortezomib | RI-BPI +<br>Obatoclax | RI-BPI +<br>MLN4924 |
|--------------------|---------|------------|------------|-----------|---------|------------------------|-----------------------|---------------------|
| <b>ALB (g/dL)</b>  | 3.3     | 3.2        | 3.4        | 3.2       | 3.3     | 3.3                    | 3.5                   | 3.3                 |
| <b>GLOB (g/dL)</b> | 2.3     | 2.5        | 2.4        | 2.2       | 2.2     | 2.5                    | 2.5                   | 2.4                 |

Hematological and biochemical parameters of C57BL/6 mice treated with the schedule and doses of OCI-Ly1 and OCI-Ly7 mice.
